# Supplementary material for: Anti-Inflammatory Activity of the Constituents from the Leaves of Perilla frutescens var. acuta
Source: MDPI journal article supplement (doi:10.3390/ph16121655), 2023-11-28
Supplement: s1 [file s1]

## Anti-inflammatory activity of the constituents from the leaves of *Perilla frutense* var. *acuta*

Isoo Youn <sup>1,†</sup>, Sujin Han <sup>1,†</sup>, Hee Jin Jung <sup>2</sup>, Sang Gyun Noh <sup>2</sup>, Hae Young Chung <sup>2</sup>, Yeon Kyoung Koo <sup>3</sup>,

Sunhye Shin <sup>4,\*</sup>, and Eun Kyoung Seo <sup>4,\*</sup>

<sup>1</sup> Graduate School of Pharmaceutical Sciences, College of Pharmacy, Ewha Womans University, Seoul 03760, Korea; [isooyoun87@gmail.com](mailto:isooyoun87@gmail.com) (I.Y.); [sujinh94@gmail.com](mailto:sujinh94@gmail.com) (S.H.); [yuny@ewha.ac.kr](mailto:yuny@ewha.ac.kr) (E.K.S.)

<sup>2</sup> Department of Pharmacy, College of Pharmacy, Pusan National University, Busan 46241, Korea; [hjjung2046@pusan.ac.kr](mailto:hjjung2046@pusan.ac.kr) (H.J.J.); [rskrsk92@pusan.ac.kr](mailto:rskrsk92@pusan.ac.kr) (S.G.N.); [hyjung@pusan.ac.kr](mailto:hyjung@pusan.ac.kr) (H.Y.C.)

<sup>3</sup> Department of R&I Center, COSMAXBIO, Seongnam 13487, Korea; [ygkoo@cosmax.com](mailto:ygkoo@cosmax.com) (Y.K.K.)

<sup>4</sup> Major of Food and Nutrition, Division of Applied Food System, Seoul Women's University, Seoul 01797, Korea; [ygkoo@cosmax.com](mailto:ygkoo@cosmax.com) (Y.K.K.)

\* Correspondence: [yuny@ewha.ac.kr](mailto:yuny@ewha.ac.kr) (E.K.S.); [sshin@swu.ac.kr](mailto:sshin@swu.ac.kr) (S.S.)

† These authors contributed equally to this work.

## TABLE OF CONTENTS

|                                                                                                           |   |
|-----------------------------------------------------------------------------------------------------------|---|
| <b>Figure S1.</b> <sup>1</sup> H NMR spectrum of compound <b>1</b> .....                                  | 3 |
| <b>Figure S2.</b> <sup>13</sup> C NMR spectrum of compound <b>1</b> .....                                 | 3 |
| <b>Figure S3.</b> <sup>1</sup> H NMR spectrum of compound <b>2</b> .....                                  | 4 |
| <b>Figure S4.</b> <sup>13</sup> C NMR spectrum of compound <b>2</b> .....                                 | 4 |
| <b>Figure S5.</b> <sup>1</sup> H NMR spectrum of compound <b>3</b> .....                                  | 5 |
| <b>Figure S6.</b> <sup>13</sup> C NMR spectrum of compound <b>3</b> .....                                 | 5 |
| <b>Table S1.</b> Primer sequences used for quantitative real-time PCR.....                                | 6 |
| <b>Table S2.</b> The cell viability (%) of Raw 264.7 cells using an MTT assay.....                        | 6 |
| <b>Table S3.</b> PPAR-α agonistic potency of <b>1-3</b> compared to that of the control.....              | 6 |
| <b>Table S4.</b> PPAR-δ agonistic potency of <b>1-3</b> compared to that of the control.....              | 6 |
| <b>Table S5.</b> PPAR-γ agonistic potency of <b>1-3</b> compared to that of the control.....              | 6 |
| <b>Table S6.</b> Inhibition of NF-κB transcriptional activity compared to that of the control.....        | 7 |
| <b>Table S7.</b> Inhibition of NF-κB transcriptional activity by the Perilla extract and <b>1-3</b> ..... | 7 |

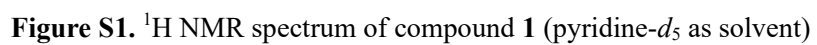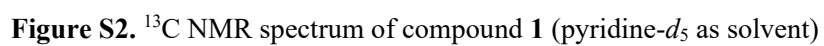

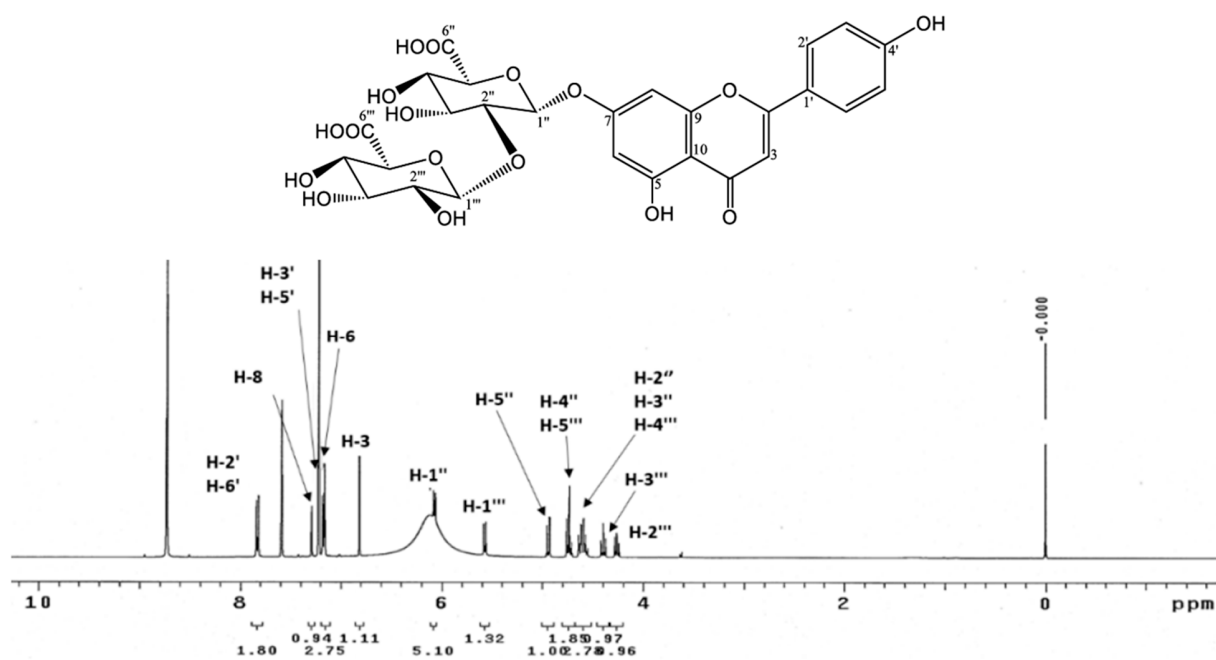

**Figure S3.**  $^1\text{H}$  NMR spectrum of compound 2 ( $\text{pyridine-}d_5$  as solvent)

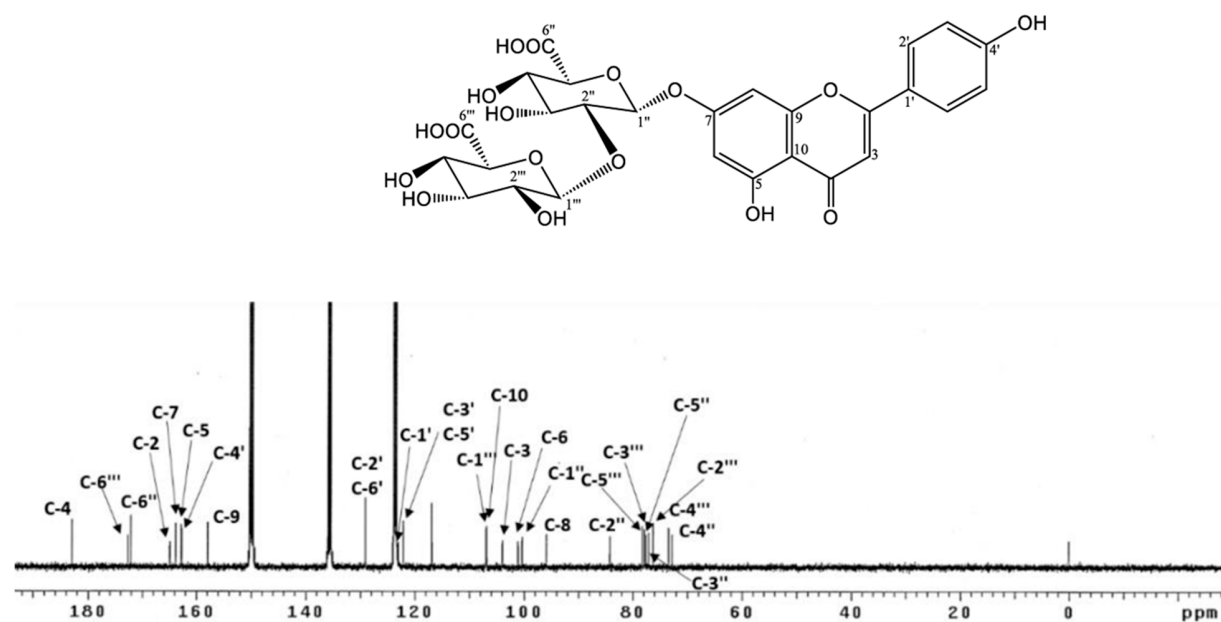

**Figure S4.**  $^{13}\text{C}$  NMR spectrum of compound 2 ( $\text{pyridine-}d_5$  as solvent)

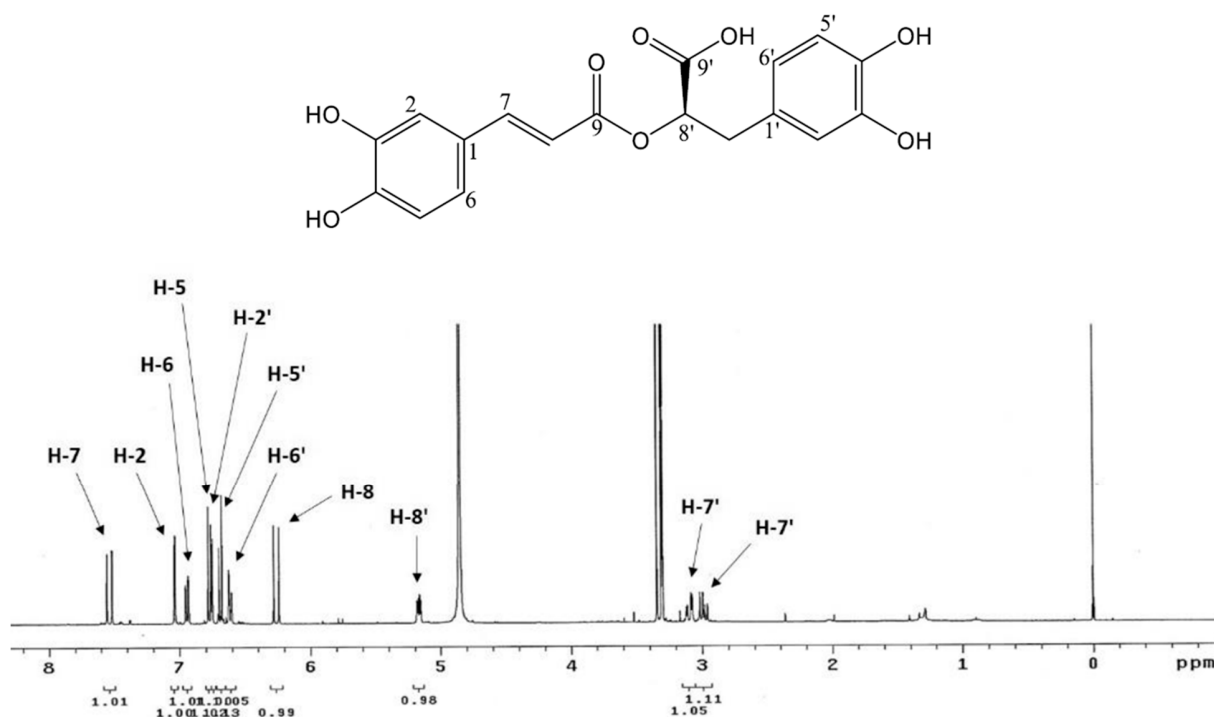

**Figure S5.**  $^1\text{H}$  NMR spectrum of compound **3** (methanol- $d_4$  as solvent)

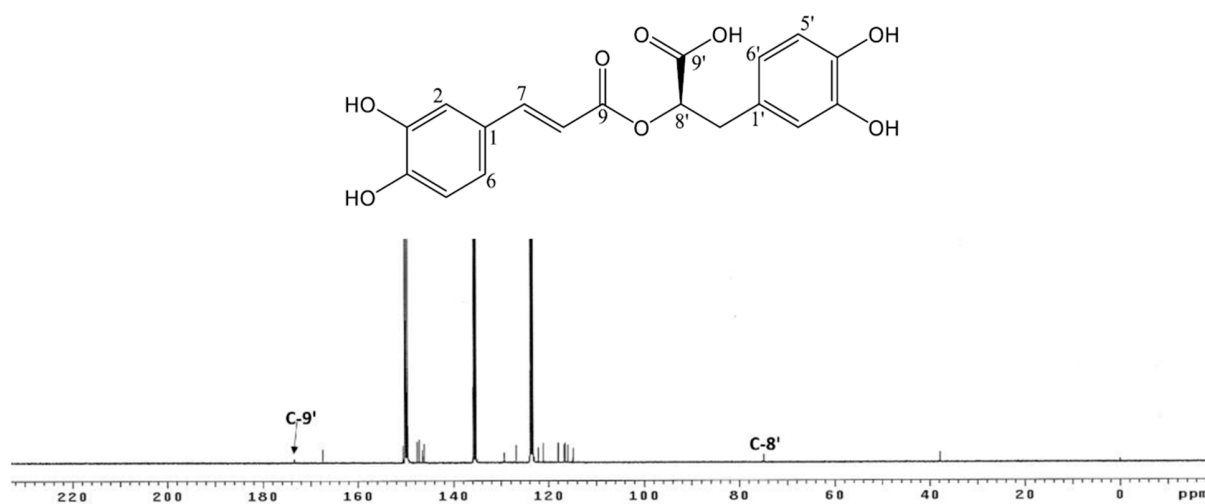

**Figure S6.**  $^{13}\text{C}$  NMR spectrum of compound **3** (methanol- $d_4$  as solvent)

**Table S1.** Primer sequences used for quantitative real-time PCR.

| Gene        | Forward Primer                | Reverse Primer                |
|-------------|-------------------------------|-------------------------------|
| <i>18S</i>  | ATC CCT GAG AAG TTC CAG CA    | CCT CTT GGT GAG GTC GAT GT    |
| <i>Il6</i>  | TTC CTC TCT GCA AGA GAC TTC C | TGA AGT CTC CTC TCC GGA CTT   |
| <i>Mcp1</i> | CAC TCA CCT GCT GCT ACT CA    | GCT TGG TGA CAA AAA CTA CAG C |
| <i>Tnfa</i> | AGC CCC CAG TCT GTA TCC TT    | CTC CCT TTG CAG AAC TCA GG    |

**Table S2.** The cell viability (%) of Raw 264.7 cells using an MTT assay.

| Extract       |                     |                   | 1          |                     |                   | 2                   |                   | 3                   |                   |
|---------------|---------------------|-------------------|------------|---------------------|-------------------|---------------------|-------------------|---------------------|-------------------|
| Conc. (µg/mL) | CV <sup>a</sup> (%) | Stdv <sup>b</sup> | Conc. (µM) | CV <sup>a</sup> (%) | Stdv <sup>b</sup> | CV <sup>a</sup> (%) | Stdv <sup>b</sup> | CV <sup>a</sup> (%) | Stdv <sup>b</sup> |
| 0             | 100.0               | 4.0               | 0          | 100.0               | 0.5               | 100.0               | 4.2               | 100.0               | 8.5               |
| 10            | 97.5                | 2.0               | 5          | 111.4               | 2.9               | 94.7                | 2.2               | 105.7               | 1.4               |
| 50            | 80.3                | 2.7               | 10         | 114.6               | 3.3               | 98.7                | 1.1               | 100.8               | 2.5               |
| 100           | 81.8                | 0.8               | 50         | 111.0               | 12.8              | 94.3                | 1.9               | 100.6               | 3.0               |

<sup>a</sup>Cell viability. <sup>b</sup>Standard deviation.**Table S3.** PPAR-α agonistic potency of **1-3** compared to that of the control.

| Blank          | PPAR-α + PPRE <sup>a</sup> | WY14643 | Extract <sup>b</sup> | 1 <sup>c</sup> | 2 <sup>c</sup> | 3 <sup>c</sup> |
|----------------|----------------------------|---------|----------------------|----------------|----------------|----------------|
| Percentage (%) | 100.00                     | 158.36  | 170.93               | 133.30         | 121.61         | 160.58         |
| ratio          | 1.00                       | 1.58    | 1.71                 | 1.33           | 1.22           | 1.61           |

<sup>a</sup>A Control. <sup>b</sup>A concentration of the extract: 20 µg/mL. <sup>c</sup>A concentration of **1-3**: 10µM.**Table S4.** PPAR-δ agonistic potency of **1-3** compared to that of the control.

| Blank          | PPAR-δ + PPRE <sup>a</sup> | GW501516 | Extract <sup>b</sup> | 1 <sup>c</sup> | 2 <sup>c</sup> | 3 <sup>c</sup> |
|----------------|----------------------------|----------|----------------------|----------------|----------------|----------------|
| Percentage (%) | 100.00                     | 143.36   | 118.84               | 91.23          | 80.34          | 101.92         |
| Ratio          | 1.00                       | 1.43     | 1.19                 | 0.91           | 0.80           | 1.02           |

<sup>a</sup>A control. <sup>b</sup>A concentration of the extract: 20 µg/mL. <sup>c</sup>A concentration of **1-3**: 10µM.**Table S5.** PPAR-γ agonistic potency of **1-3** compared to that of the control.

| Blank          | PPAR-γ + PPRE <sup>a</sup> | Rosiglitazone | Extract <sup>b</sup> | 1 <sup>c</sup> | 2 <sup>c</sup> | 3 <sup>c</sup> |
|----------------|----------------------------|---------------|----------------------|----------------|----------------|----------------|
| Percentage (%) | 100.00                     | 153.79        | 106.44               | 101.85         | 117.22         | 88.58          |
| Ratio          | 1.00                       | 1.54          | 1.06                 | 1.02           | 1.17           | 0.89           |

<sup>a</sup>A control. <sup>b</sup>A concentration of the extract: 20 µg/mL. <sup>c</sup>A concentration of **1-3**: 10µM.

**Table S6.** Inhibition of NF- $\kappa$ B transcriptional activity compared to that of the control.

|                | <b>1<sup>b</sup></b> |           |            |            | <b>2<sup>b</sup></b> |            |            | <b>3<sup>b</sup></b> |            |            |
|----------------|----------------------|-----------|------------|------------|----------------------|------------|------------|----------------------|------------|------------|
|                | LPS <sup>a</sup>     | 5 $\mu$ M | 10 $\mu$ M | 50 $\mu$ M | 5 $\mu$ M            | 10 $\mu$ M | 50 $\mu$ M | 5 $\mu$ M            | 10 $\mu$ M | 50 $\mu$ M |
| Percentage (%) | 100.00               | 43.17     | 25.04      | 20.14      | 56.66                | 36.42      | 28.86      | 44.14                | 38.79      | 24.72      |
| Inhibition (%) | 0.00                 | 56.83     | 74.96      | 79.86      | 43.34                | 63.58      | 71.14      | 55.86                | 61.21      | 75.28      |

<sup>a</sup>A control (1  $\mu$ g/mL). <sup>b</sup>Three concentrations of **1-3** were 5, 10, and 50  $\mu$ M.

**Table S7.** Inhibition of NF- $\kappa$ B transcriptional activity by the Perilla extract and **1-3**.

| <b>Extract</b>                |                |                 |                 | <b>1</b>   |                |                 |                 |
|-------------------------------|----------------|-----------------|-----------------|------------|----------------|-----------------|-----------------|
| Conc.                         | <i>Il6/18s</i> | <i>Mcp1/18s</i> | <i>Tnfa/18s</i> | Conc.      | <i>Il6/18s</i> | <i>Mcp1/18s</i> | <i>Tnfa/18s</i> |
| <b>0 <math>\mu</math>g/mL</b> | 0.00           | 0.00            | 0.00            | 0 $\mu$ M  | 0.00           | 0.00            | 0.00            |
| 10 $\mu$ g/mL                 | -17.74         | 45.96           | 37.57           | 5 $\mu$ M  | -38.76         | -39.62          | 3.74            |
| 50 $\mu$ g/mL                 | 0.69           | 56.95           | 61.44           | 10 $\mu$ M | -28.72         | -44.71          | 4.32            |
| 100 $\mu$ g/mL                | 24.14          | 63.27           | 77.24           | 50 $\mu$ M | 79.00          | 67.94           | 49.09           |
| <b>2</b>                      |                |                 |                 | <b>3</b>   |                |                 |                 |
| Conc.                         | <i>Il6/18s</i> | <i>Mcp1/18s</i> | <i>Tnfa/18s</i> | Conc.      | <i>Il6/18s</i> | <i>Mcp1/18s</i> | <i>Tnfa/18s</i> |
| 0 $\mu$ M                     | 0.00           | 0.00            | 0.00            | 0 $\mu$ M  | 0.00           | 0.00            | 0.00            |
| 5 $\mu$ M                     | -36.21         | -69.95          | 6.09            | 5 $\mu$ M  | 7.20           | 30.69           | 27.74           |
| 10 $\mu$ M                    | -30.89         | -44.39          | 19.34           | 10 $\mu$ M | 28.56          | 53.88           | 39.56           |
| 50 $\mu$ M                    | 80.97          | 44.65           | 21.98           | 50 $\mu$ M | 31.50          | 35.74           | 31.81           |
